# Supplementary material for: Development of a Broad-Spectrum Antiserum against Cobra Venoms Using Recombinant Three-Finger Toxins
Source: MDPI journal article supplement (doi:10.3390/toxins13080556), 2021-08-10
Supplement: s1 [file s1]

# Supplementary Materials: Development of a Broad-Spectrum Antiserum against Cobra Venoms Using Recombinant Three-Finger Toxins

Bing-Sin Liu, Bo-Rong Jiang, Kai-Chieh Hu, Chien-Hsin Liu, Wen-Chin Hsieh, Min-Han Lin and Wang-Chou Sung

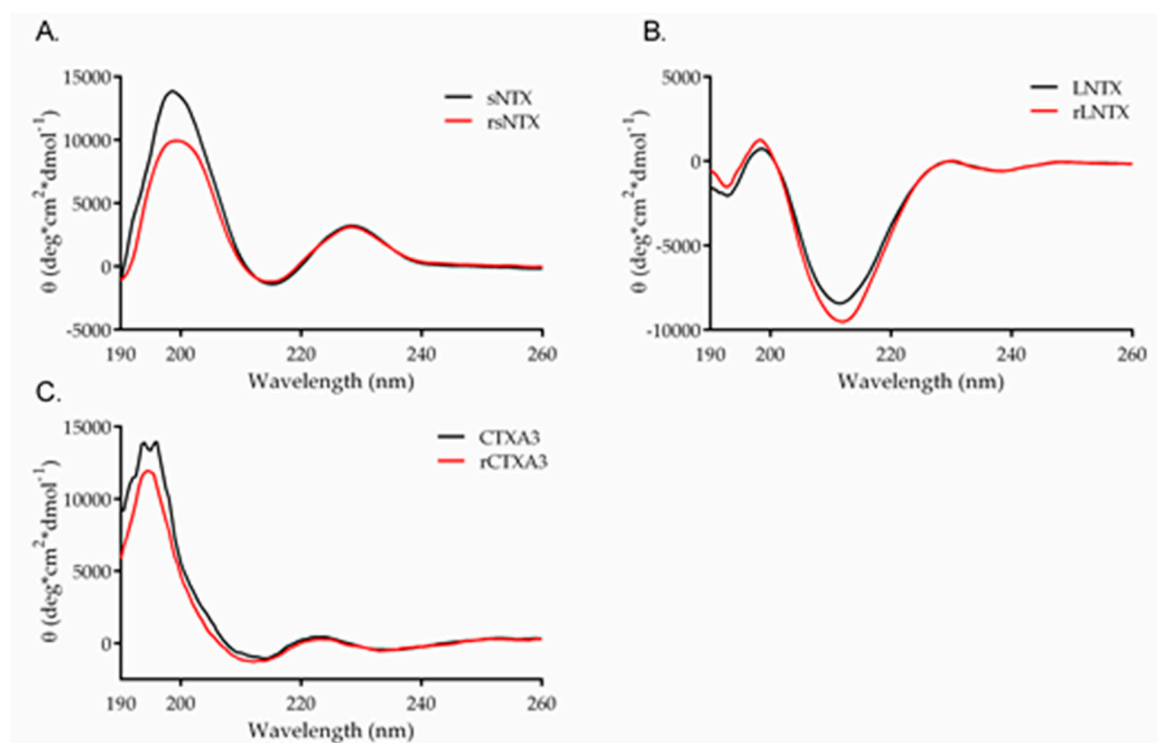

**Figure S1.** The CD spectra of native and recombinant (A) sNTX, (B) LNTX, and (C) CTXA3. The spectra of native toxins purified from venoms are shown in black lines; the spectra of recombinant toxins are shown in red lines.

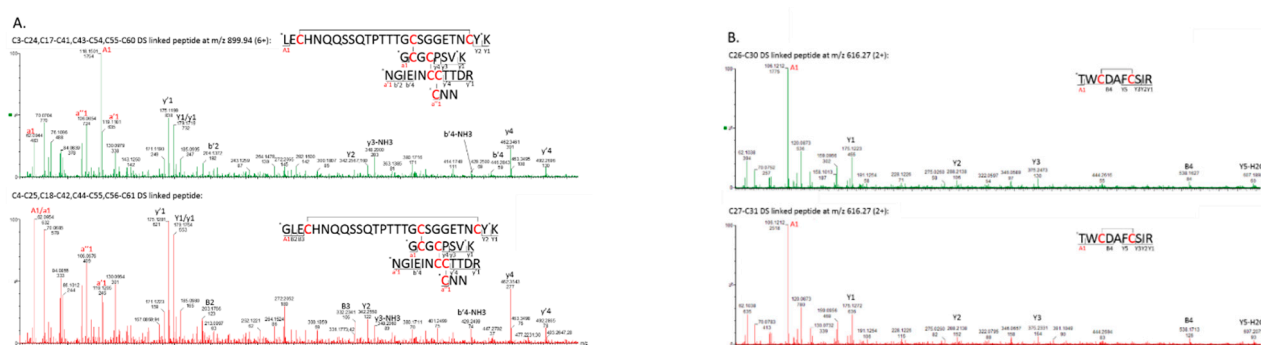

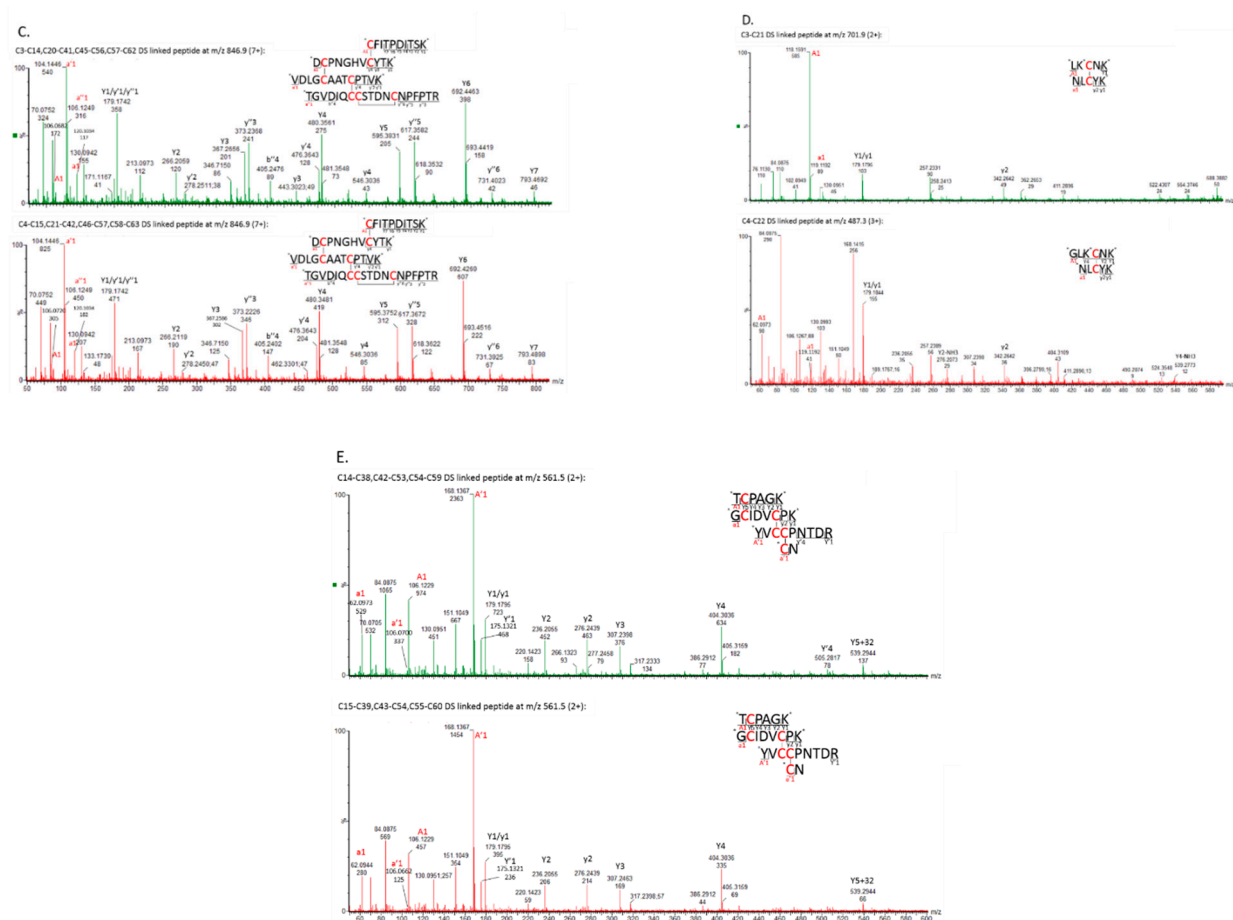

**Figure S2.** Identification of linkage sites of disulfide bonds by MS analysis. Comparative MS/MS spectra of the disulfide bond-containing peptides derived from the tryptic digests of native (green) or recombinant (red) (A) sNTX, (B,C) LNTX, and (D,E) CTXA3. CID fragment ions (a1/a'1/A1/A'1 and y1/y1/Y'/Y' ions) are annotated. Asterisks (\*) indicate the sites of dimethyl (d2) labeling in the peptides.

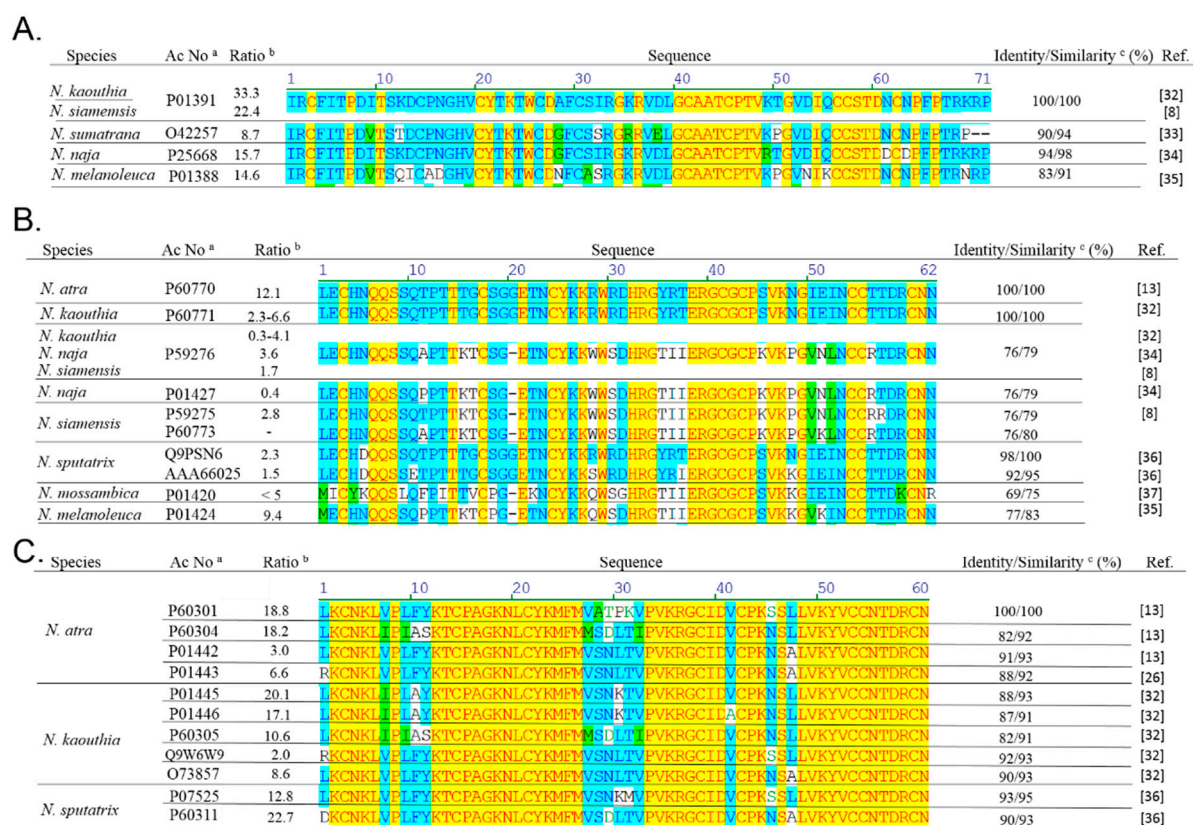

**Figure S3.** Sequence alignment of the major (A) LNTXs, (B) sNTXs, and (C) CTXs identified in cobra snake venoms. The percentage of amino acids that are identical or similar at the same position compared to the sequence of P01391 (for LNTXs), P60770 (for sNTXs), or P60301 (for CTXs). Conserved amino acids identical in all sequences of the same subfamily are shown in red with bright yellow background; similar amino acids are shown in black with blue or green background. The accession numbers of proteins were from the UniProt database. The percentage (%) of relative abundance in the corresponding venoms was reported in the literatures.

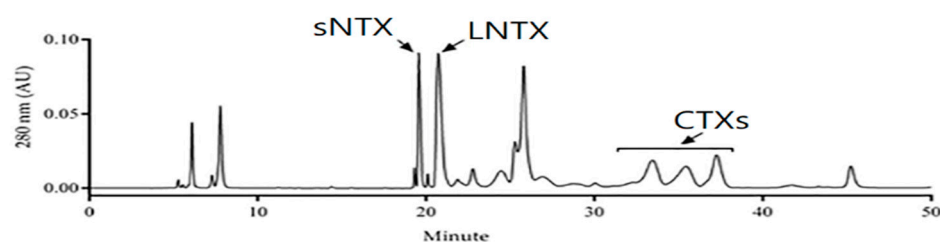

**Figure S4.** RP-HPLC elution chromatogram of the cobra venom mixture for rabbit immunization experiment. The ratio of sNTX:LNTX:CTXs in the venom mixture was estimated to be 1:1:3 based on the peak areas.

**Table S1.** Identification of *N. atra* and *N. kaouthia* venom components in the HPLC fractions using MS.

| Peak <sup>1</sup> | Protein Identity              | AC no. <sup>2</sup> | Significant Peptide                                                                                                  | Observed Ion (m/z)                                                                | MS Score | Toxin Family     |
|-------------------|-------------------------------|---------------------|----------------------------------------------------------------------------------------------------------------------|-----------------------------------------------------------------------------------|----------|------------------|
| <b>a</b>          | Cobrotoxin                    | P60770              | R.GCGCPSVK.N<br>K.NGIEINCCCTDR.C                                                                                     | 432.6748 (2+)<br>726.7258 (2+)                                                    | 69       | 3FTX             |
| <b>b</b>          | Acidic phospholipase A2       | A4FS04              | -.NLYQFK.N<br>K.GGSGTPVDDDLDR.C                                                                                      | 406.7119 (2+)<br>594.7706 (2+)                                                    | 89       | PLA2             |
| <b>c</b>          | Cytotoxin 1                   | P60304              | K.MFMMSDLTIPVK.R                                                                                                     | 706.8398 (2+)                                                                     | 375      | 3FTX             |
|                   | Cytotoxin 3                   | P60301              | K.MFMVATPK.V<br>K.LVPLFYK.T                                                                                          | 462.7221 (2+)<br>440.2524 (2+)                                                    | 101      |                  |
|                   | Cytotoxin 5                   | P07525              | K.MVPVKR.G                                                                                                           | 373.2054 (2+)                                                                     | 46       |                  |
| <b>d</b>          | Cobrotoxin-b                  | P59275              | K.TCSGETNCYK.K<br>K.WWSDHR.G<br>K.VKPGVNLNCCR.R<br>-.LECHNQSSQTPTTK.T<br>-.LECHNQSSQTPTT-<br>KTCSGETNCYK.K           | 610.2822 (2+)<br>443.7183 (2+)<br>439.5856 (3+)<br>879.9451 (2+)<br>987.1167 (3+) | 197      | 3FTX             |
|                   |                               |                     | -.LECHNQSSQAPTTK.T                                                                                                   | 576.9522 (2+)                                                                     | 149      | 3FTX             |
|                   |                               |                     | R.CFITPDITSK.D<br>K.TWCDAFCSIR.G<br>R.VDLGCAATCPTVK.T                                                                | 591.3514(2+)<br>658.3432 (2+)<br>696.3925 (2+)                                    | 98       | 3FTX             |
|                   |                               |                     | R.GCADCPTVR.K<br>R.EIVECCSTDK.C                                                                                      | 518.2423 (2+)<br>620.8072 (2+)                                                    | 70       | 3FTX             |
|                   | Weak neurotoxin 6             | P29180              | -.LTCLICEPK.Y                                                                                                        | 567.3386 (2+)                                                                     | 68       | 3FTX             |
| <b>e</b>          | Alpha-elapitoxin-Nk2a         | P01391              | R.CFITPDITSK.D<br>K.TWCDAFCSIR.G<br>R.VDLGCAATCPTVK.T                                                                | 591.3469 (2+)<br>658.3644 (2+)<br>696.3752 (2+)                                   | 124      | 3FTX             |
| <b>f</b>          | Acidic phospholipase A2 2     | P15445              | K.ISGCWPYFK.T<br>R.GGSGTPVDDDLDR.C<br>R.SWWDFAFYGCYCGR.G<br>K.NMIKCTVPSR.S <sup>3</sup><br>R.LAAICFAGAPYNDNNYNIDLK.A | 579.3079 (2+)<br>594.8204 (2+)<br>921.9120 (2+)<br>611.3373 (2+)<br>786.4366 (3+) | 309      | PLA <sub>2</sub> |
|                   |                               |                     | K.NMIQCTVPNR.S<br>R.GGSGTPVDDDLDR.C<br>R.CWPYFK.T                                                                    | 624.8400 (2+)<br>594.8148 (2+)<br>450.7263 (2+)                                   | 295      | PLA <sub>2</sub> |
|                   | Acidic phospholipase A2 2     | P00597              | R.LAAICFAGAPYNNNNYNIDLK.A<br>K.GGSGTPVDDDLDR.C                                                                       | 1178.6711 (2+)<br>594.8255 (2+)                                                   | 268      | PLA <sub>2</sub> |
|                   | Acidic phospholipase A2 DE-II | P00600              | R.GGSGTPVDDDLDR.C<br>K.NMIQCTVPNR.S                                                                                  | 594.8200 (2+)<br>624.8298 (2+)                                                    | 200      | PLA <sub>2</sub> |
|                   | Venom nerve growth factor 2   | Q5YF89              | K.TTATDIK.G<br>K.QYFFETK.C<br>K.ALTMEGNQASWR.F<br>K.GNTVTVMENVNLDNK.V                                                | 375.2329 (2+)<br>481.7730 (2+)<br>682.3720 (2+)<br>824.4734 (2+)                  | 131      | VGF              |
|                   |                               |                     | R.FDGSPCVLGSFGFR.S<br>K.TVENVGVSQVAPDNPER.F<br>K.ADVTFDSNTAFESLVVSPDK.K                                              | 748.4003 (2+)<br>906.0082 (2+)<br>1071.5872 (2+)                                  | 282      | Vespryn          |
|                   |                               |                     | K.LIPIASK.T<br>R.GCIDVCPK.N<br>K.YVCCNTDR.C<br>K.MFMMSDLTIPVK.R                                                      | 371.2701 (2+)<br>474.7489 (2+)<br>544.2528 (2+)<br>722.8949 (2+)                  | 236      | 3FTX             |
| <b>g</b>          | Cytotoxin 1                   | P60305              | K.LIPLAYK.T<br>K.MFMVAAPK.V<br>R.GCIDACPK.N                                                                          | 409.2871 (2+)<br>455.7598 (2+)<br>460.7300 (2+)                                   | 93       | 3FTX             |

|   |                                                      |        |                                 |                |     |       |
|---|------------------------------------------------------|--------|---------------------------------|----------------|-----|-------|
| h | Cytotoxin 4                                          | P60303 | K. <u>M</u> FMVATPK.V           | 478.7623 (2+)  | 45  | 3FTX  |
|   | Cytotoxin 2                                          | Q9DGH9 | K.IF <u>M</u> VATPK.V           | 461.7617 (2+)  | 57  | 3FTX  |
|   | Cytotoxin 5                                          | P07525 | K.MFMVSNK <u>M</u> VVPVK.R      | 713.8943 (2+)  | 57  | 3FTX  |
|   | Cysteine-rich venom protein natrin-1                 | Q7T1K6 | K.LTNCDSLLK.Q                   | 532.2916 (2+)  | 674 | CRISP |
|   |                                                      |        | R.VSPTASN <u>M</u> LK.M         | 532.3129 (2+)  |     |       |
|   |                                                      |        | K.EIVDLHNSLR.R                  | 399.2381 (3+)  |     |       |
|   |                                                      |        | R.RVSPTASN <u>M</u> LK.M        | 610.3337 (2+)  |     |       |
|   |                                                      |        | K.QSSCQDDWIK.S                  | 633.8123 (2+)  |     |       |
|   |                                                      |        | K.QKEIVDLHNSLR.R                | 484.6273 (3+)  |     |       |
|   |                                                      |        | K. <u>M</u> EWYPEAASNAER.W      | 785.2921 (2+)  |     |       |
|   |                                                      |        | R.TWTEIIHLWHDEYK.N              | 624.3440 (3+)  |     |       |
|   |                                                      |        | R.VLEGIQCGESIY <u>M</u> SSNAR.T | 1015.5442 (2+) |     |       |
|   | Cysteine-rich venom protein annuliferin-a (Fragment) | P0DL14 | -.NVDFNSESTR.R                  | 584.8115 (2+)  | 152 | CRISP |
|   | Cysteine-rich venom protein ophanin                  | Q7ZT98 | K.QSSCQDEWIK.S                  | 640.8143 (2+)  | 119 | CRISP |
|   | Cobra venom factor                                   | Q91132 | R.IDVPLQIEK.A                   | 527.8409 (2+)  | 117 | CVF   |

<sup>1</sup> The peak refers to the labeling in Figure 3. <sup>2</sup> AC is the accession number in Uniprot database. <sup>3</sup> The underline of methionine (M) means it was oxidized. Abbreviations: SVMP indicates snake venom metalloproteinase. CRISP is cysteine-rich secretory protein. 3FTX means three finger toxins.
